# Supplementary material for: GM1 ganglioside modulates the inflammasome-autophagy axis to protect microglia against Aβ oligomer-induced neuroinflammation
Source: Research Square preprint supplement (doi:10.21203/rs.3.rs-6939497/v1), 2025-06-25
Supplement: Supplementary file 1 [file ffc284f1e7d56a3e3f7b7877.docx]

**Supplemental Material**

**GM1 ganglioside modulates the inflammasome-autophagy axis to protect microglia against Aβ oligomer-induced neuroinflammation**

Wenxuan Wang1, Lin Zhao PhD1, andShawn N. Whitehead PhD1

1Vulnerable Brain Lab, Department of Anatomy and Cell Biology, Schulich School of Medicine and Dentistry, Western University, London, Ontario, Canada, N6A 5C1

**Corresponding Author:**

Shawn Whitehead, PhD

Department of Anatomy and Cell Biology

458 Medical Sciences Building

The University of Western Ontario

London, Ontario, Canada

N6A 3K7

519 661-2111 x80440

[shawn.whitehead@schulich.uwo.ca](mailto:shawn.whitehead@schulich.uwo.ca)

| Gene | Forward Primer (5”🡪3”) | Reverse Primer (5”🡪3”) |
| --- | --- | --- |
| *Rpl-13α* | GTTCGGCTGAAGCCTACCAG | TTCCGTAACCTCAAGATCTGCT |
| *Il-6* | GCCAGAGTCCTTCAGAGAGAT | GGAAATTGGGGTAGGAAGGAC |
| *Il-1β* | GCCACCTTTTGACAGTGATGAG | GACAGCCCAGGTCAAAGGTT |
| *Nlrp3* | CCTTGGAGACACAGGACTCAG | CGCACAGATCGCCAAGATCA |
| *iNOS* | AGGGACTGAGCTGTTAGAGACA | AGAGAAACTTCCAGGGGCAAG |
| *Tnf-α* | GCCTCTTCTCATTCCTGCTTG | CTGATGAGAGGGAGGCCATT |
| *Tgf-β* | AATCAACGGGATCAGCCCC | AGAAGTTGGCATGGTAGCCC |
| *Glb1* | CGGTCGACCTCCAATTCTTCGG | TACTTGACCCTTGGACCACCCA |
| *Hexa* | CTACATCCAGACGCTGCTGGAC | TACTGGCATTTCTTCCCGCCAC |
| *B4galnt1* | GAGATATACCAGGTGAACCTGAG | CTGCCGGTTGAGTTTATCCA |
| *B3galt4* | GGTTAAAGCCGTCCTCCCACCT | ACCAGTAGTAGGACCGCCAGGA |
| *Neu3* | TTCATTGAGCCCCAGGTGAC | AAAGGCCGGAAGCTCACTAC |
| *Map1lc3a* | GTCCTGGACAAGACCAAGTTCC | CCATTCACCAGGAGGAAGAAGG |
| *Atg5* | GGACAGCTGCACACACTTGG | TGGCTCTATCCCGTGAATCAT |
| *Ulk1* | GCAGCAAAGACTCCTGTGACAC | CCACTACACAGCAGGCTATCAG |
| *Ctsd* | AGGTGAAGGAGCTGCAGAAG | ATTCCCATGAAGCCACTCAG |
| *Lamp1* | ACCTGTCGAGTGGCAACTTCA | GGGCACAAGTGGTGGTGAG |

**Table S1: Forward and reverse primer sequences used for qPCR experiments (*mus musculus).***


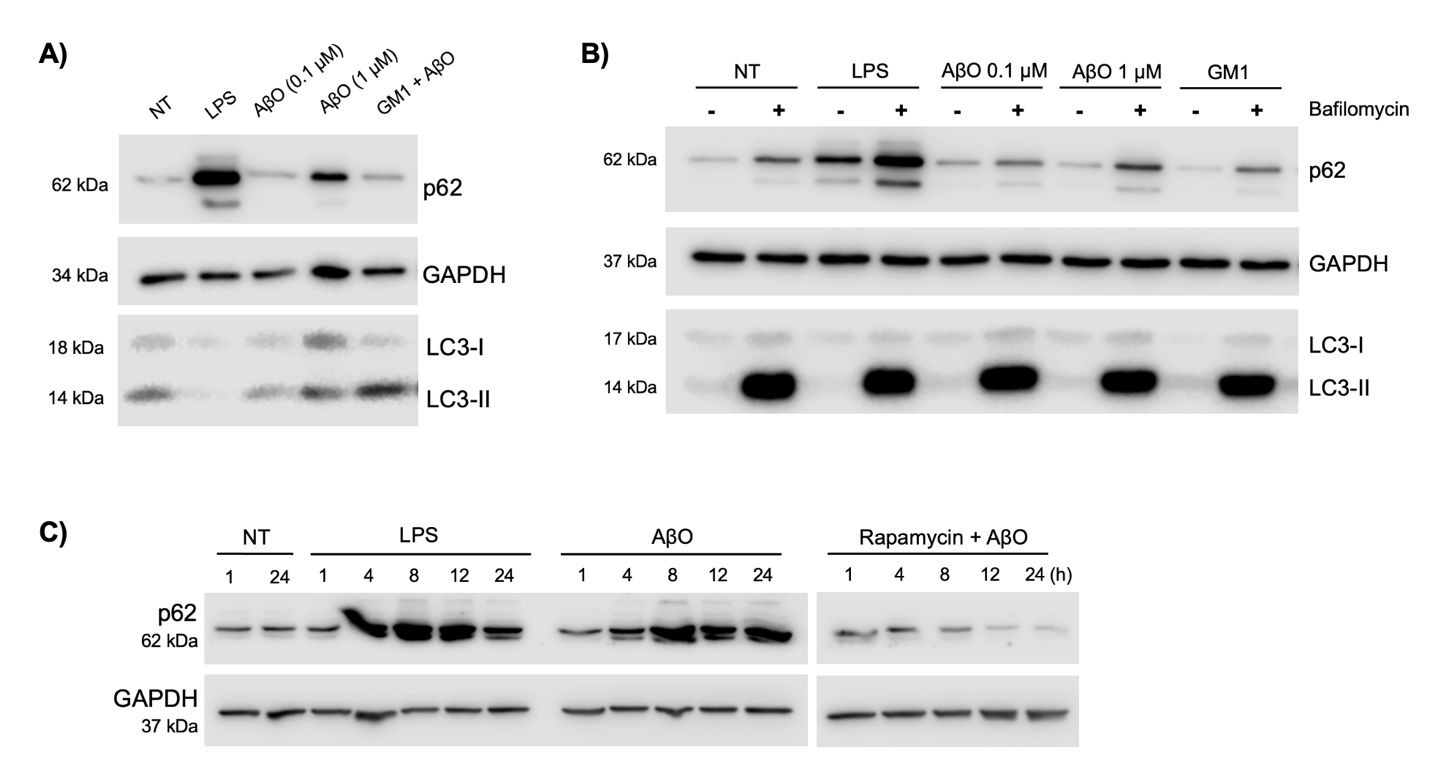


**Supplemental Figure S1:** Western blots analysis of autophagy flux. A) LC3 II/I ratio and p62 protein expression following microglia activation with LPS or AβO. B) Autophagy changes with Bafilomycin A1 (100 nM) post-treatment. C) p62 protein expression across 24 h time course with rapamycin (100 nM) pre-treatment and AβO activation.


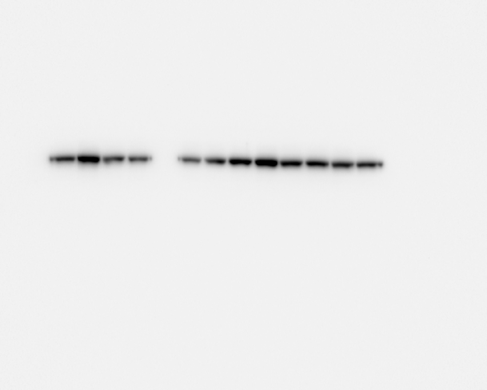

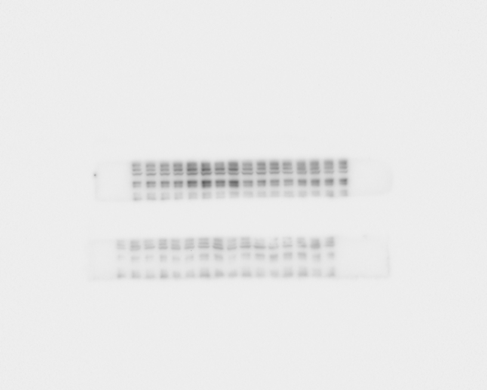

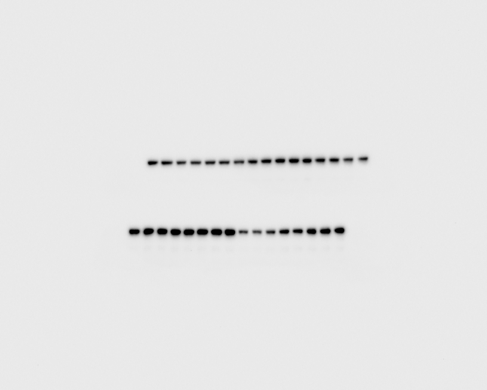


**Figure 4C:**

**Figure 4B:**

p-p65

NLRP3

p65


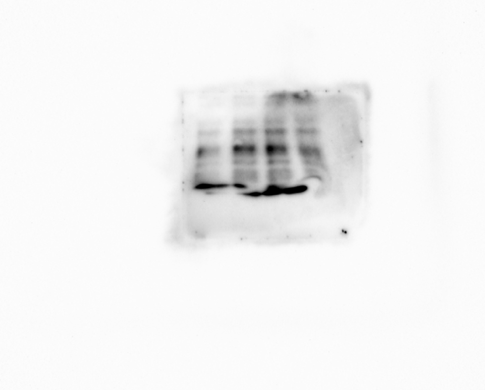

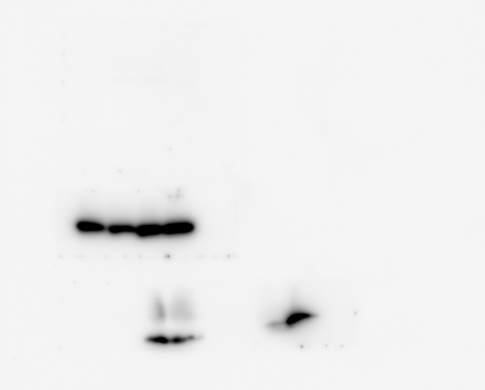

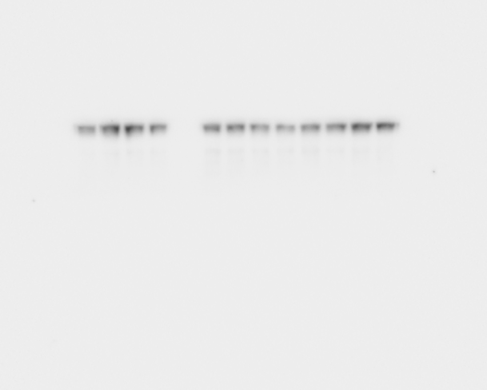


Pro-IL-1*β*

LC3B

Caspase-1

Aβ 1-42


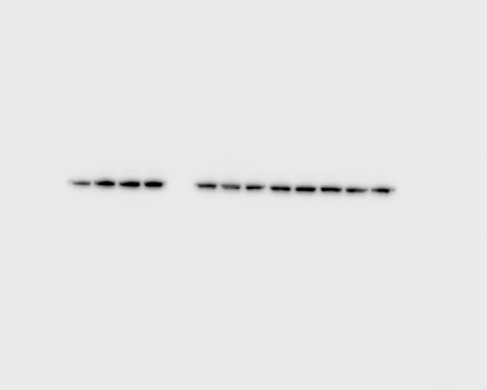

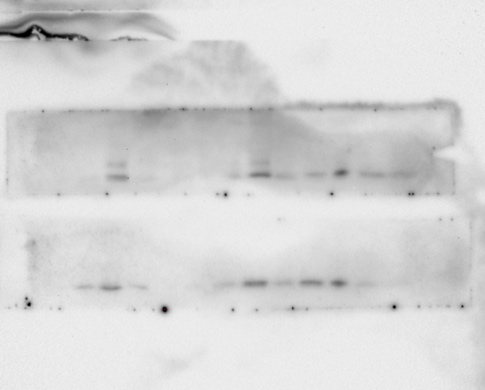

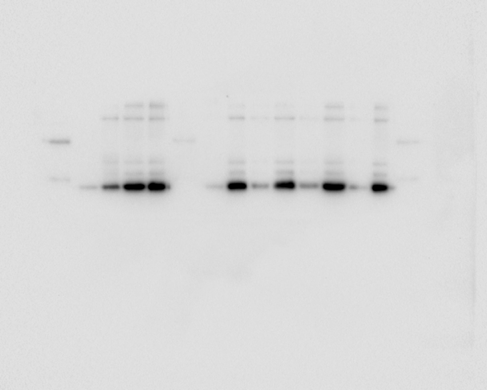


**Figure 4G:**

Alpha-tubulin

Cleaved caspase-1

Tsg101

Cleaved IL-1*β*

**Supplemental Figure S2:** Full western blot images for Figure 4. Representative western blot images in the main text were taken from the first 4 samples from the left.


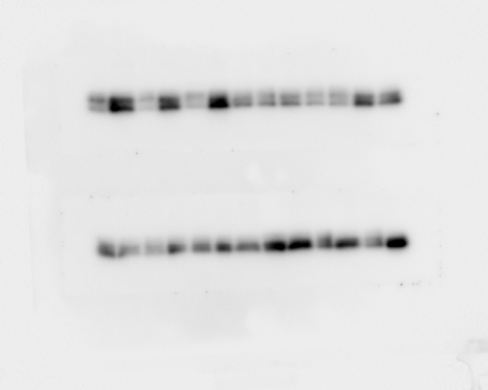

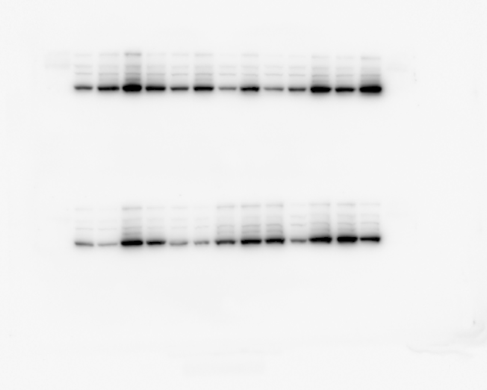

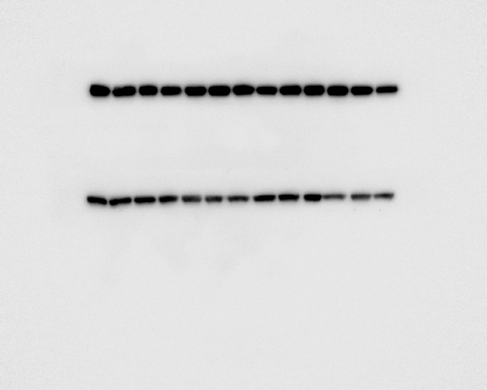

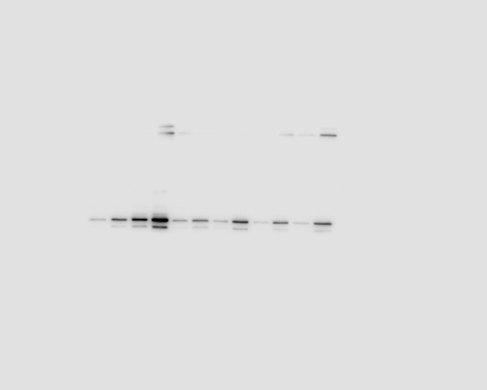

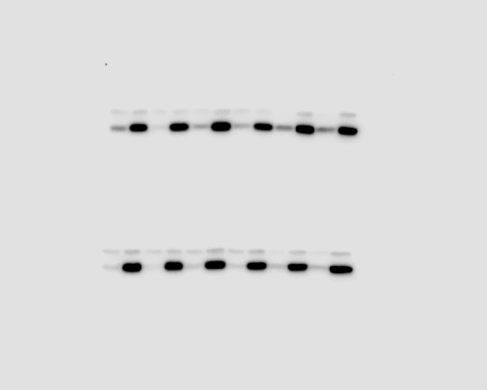

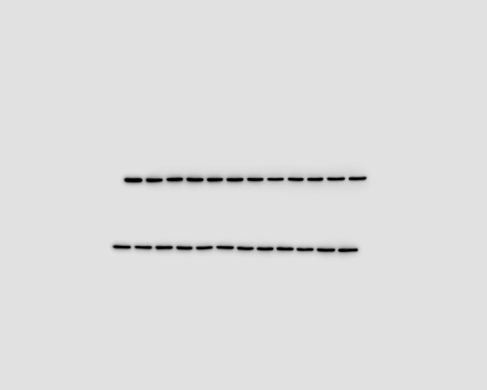


**Figure 5C**

GAPDH

p-AKT

LC3a/b

GAPDH

p62

AKT

GAPDH

p62

LC3a/b

**Figure 5F**


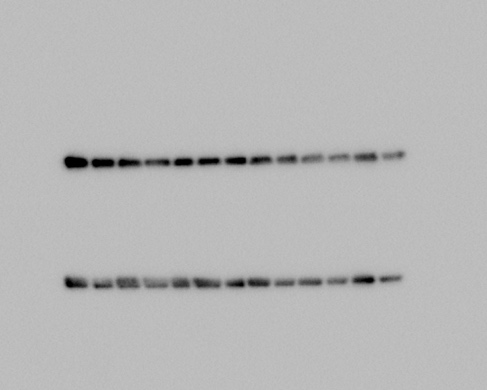

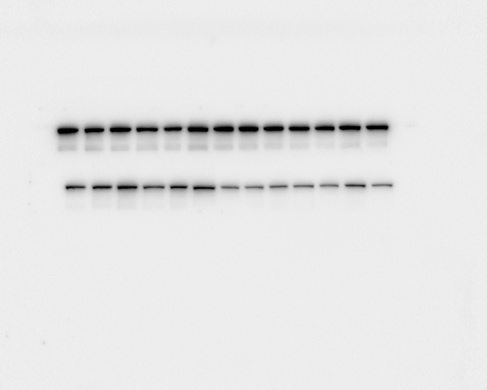

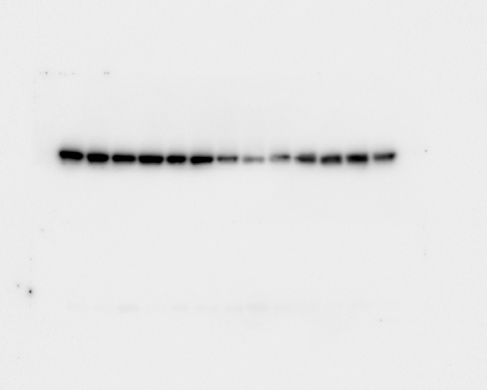

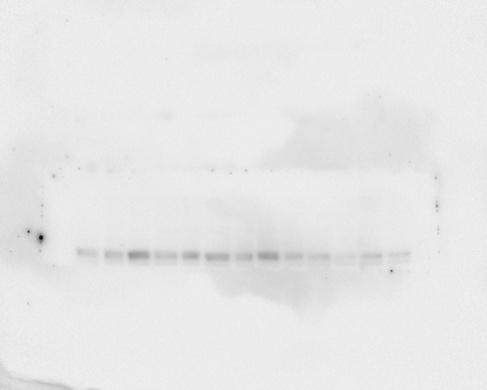


mTOR

**Figure 5G**

p-mTOR

**Supplemental Figure S3:** Full western blot images for Figure 5. Representative western blot images in the main text were taken from the first 4 samples (Fig. 5C, 5F) or the first 6 samples (Fig. 5G) from the left.


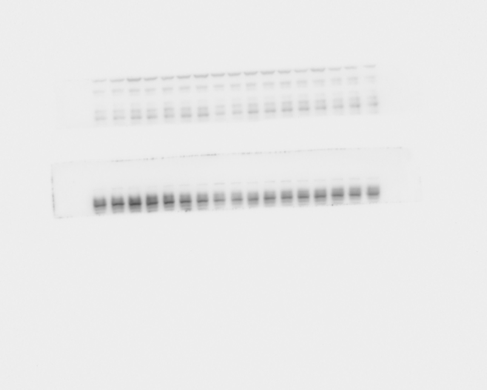

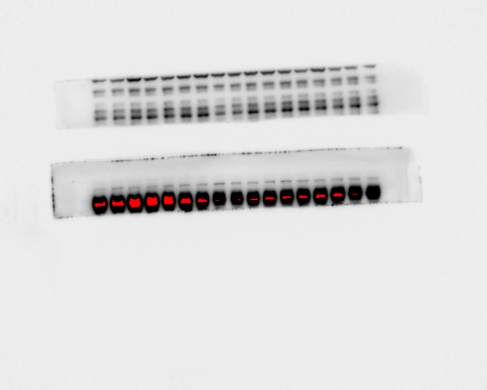

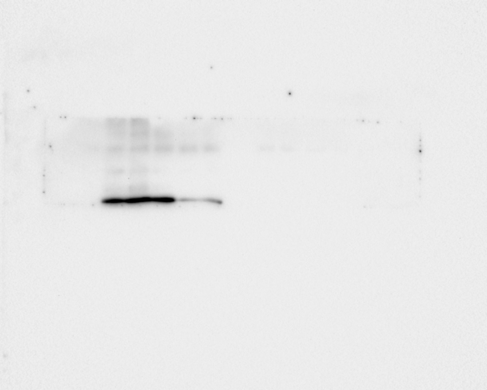

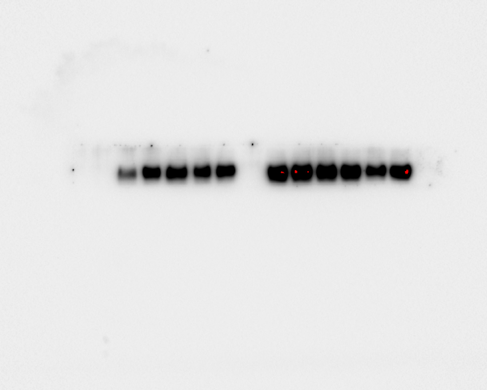


**Figure 6C**

Lamp2

Aβ 1-42

**Figure 6D**

Cathepsin D

Lamp2a

**Supplemental Figure S4:** Full western blot images for Figure 6. Representative western blot images in the main text were taken from the first 5 samples (Fig. 6C) or the first 4 samples (Fig. 6D) from the left.
